# Supplementary material for: Rapid SO 2 emission reductions significantly increase troposphericammonia concentrations over the North China Plain
Source: Copernicus journal article supplement (doi:10.5194/acp-2018-880), 2018-09-05
Supplement: Supplementary file 1 [file acp-2018-880-supplement.pdf]

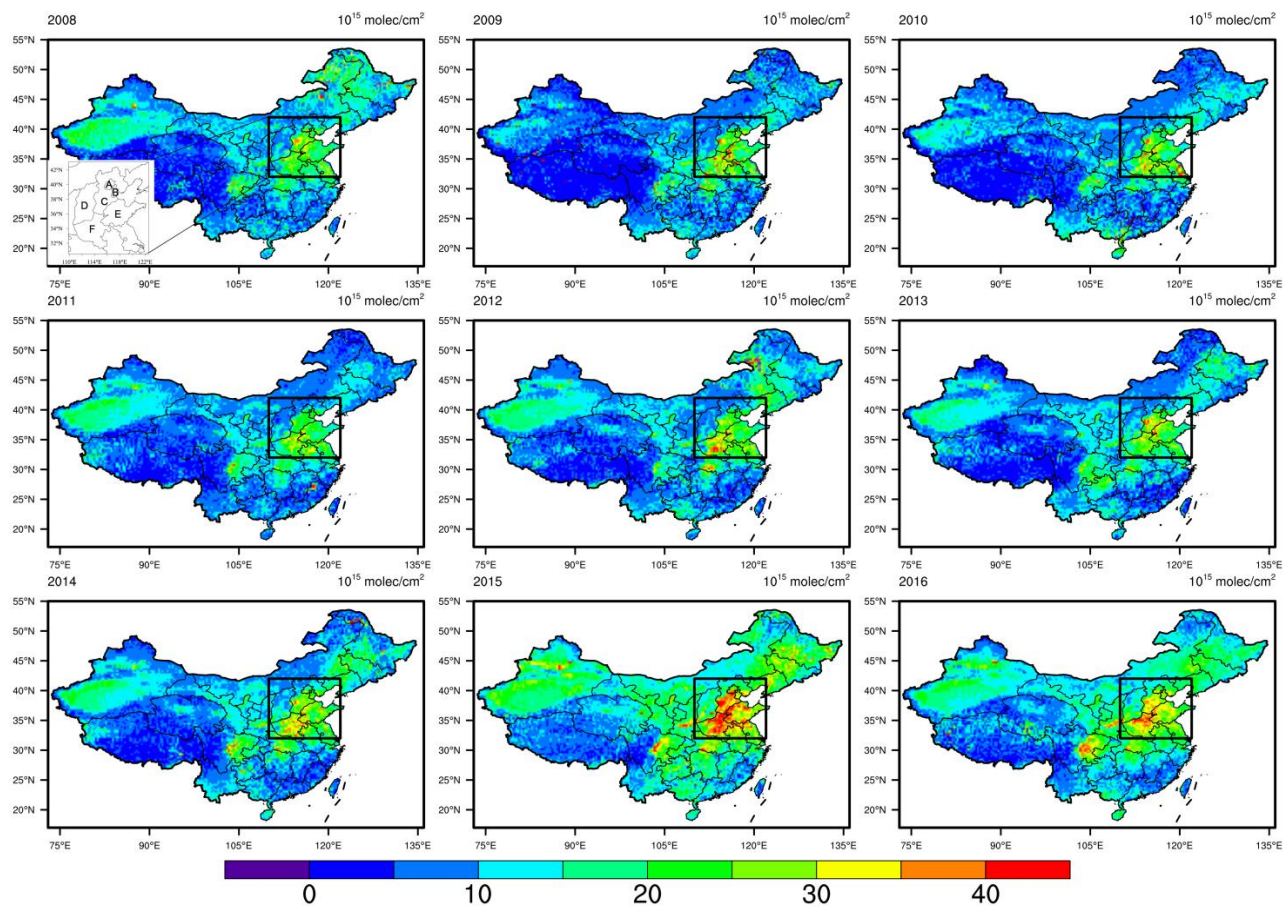

**Figure S1.** Spatial distribution of  $\text{NH}_3$  column densities in mainland China observed by IASI sensor from 2008 to 2016. The area of interest in this study includes Beijing (A), Tianjin (B), Hebei (C), Shanxi (D), Shandong (E) and Henan (F) Provinces, as marked in the black rectangle. The small islands in South China Sea are not included in the figure.

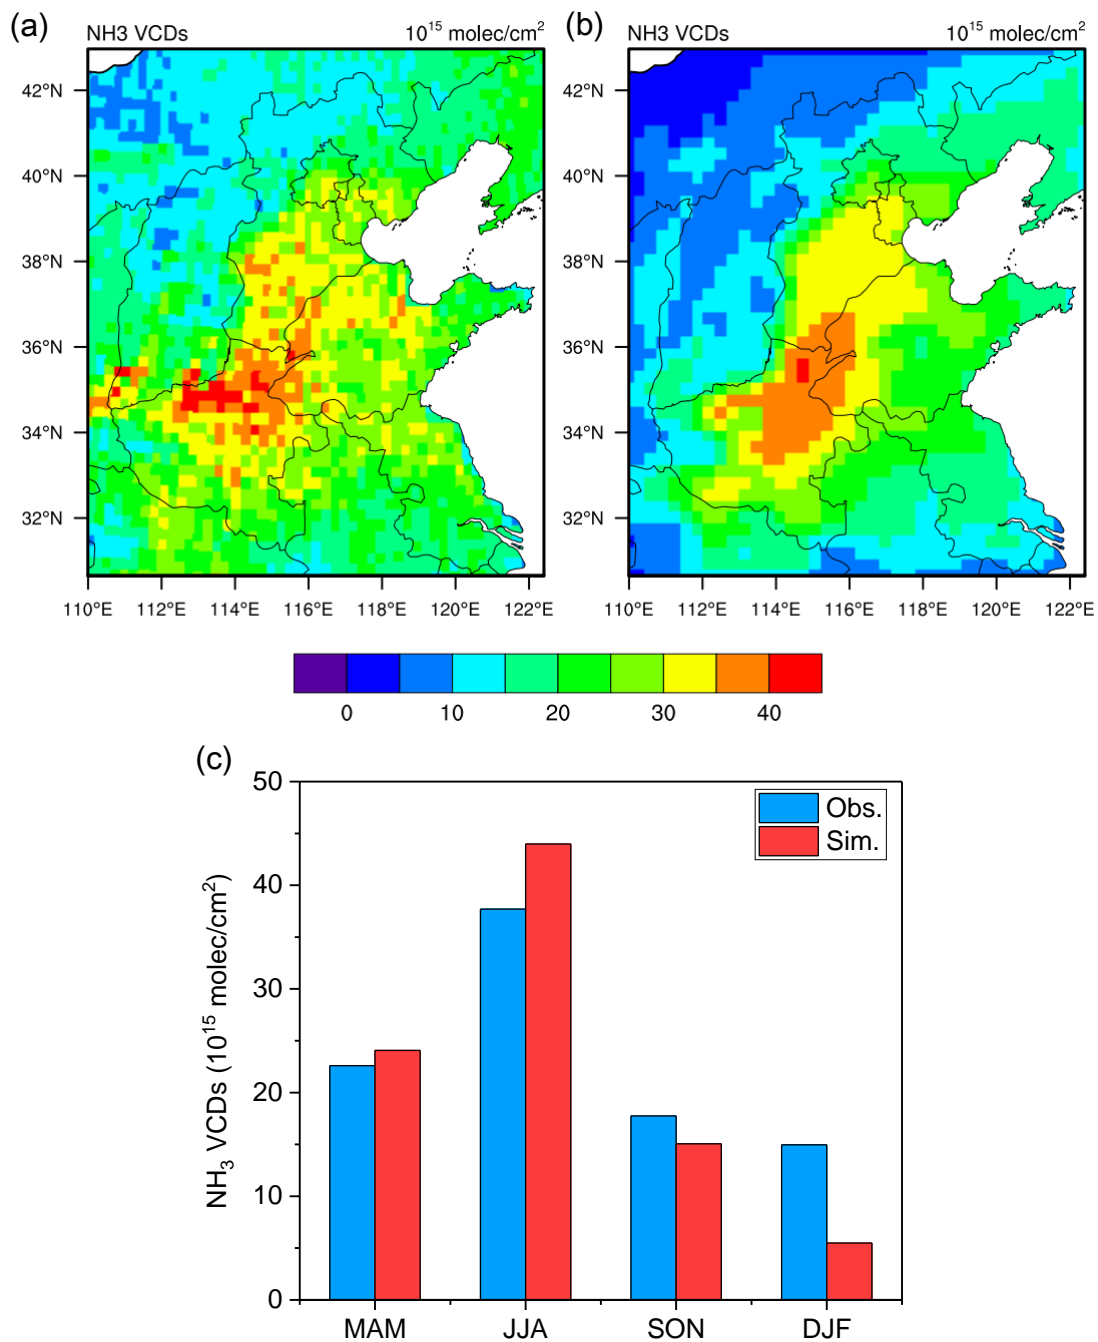

**Figure S2.** Spatial distribution of satellite observations (a) and modelled tropospheric NH<sub>3</sub> column densities (b) for the year of 2016; (c) comparison of the regional mean NH<sub>3</sub> column densities between observations and simulations among different seasons in 2016.

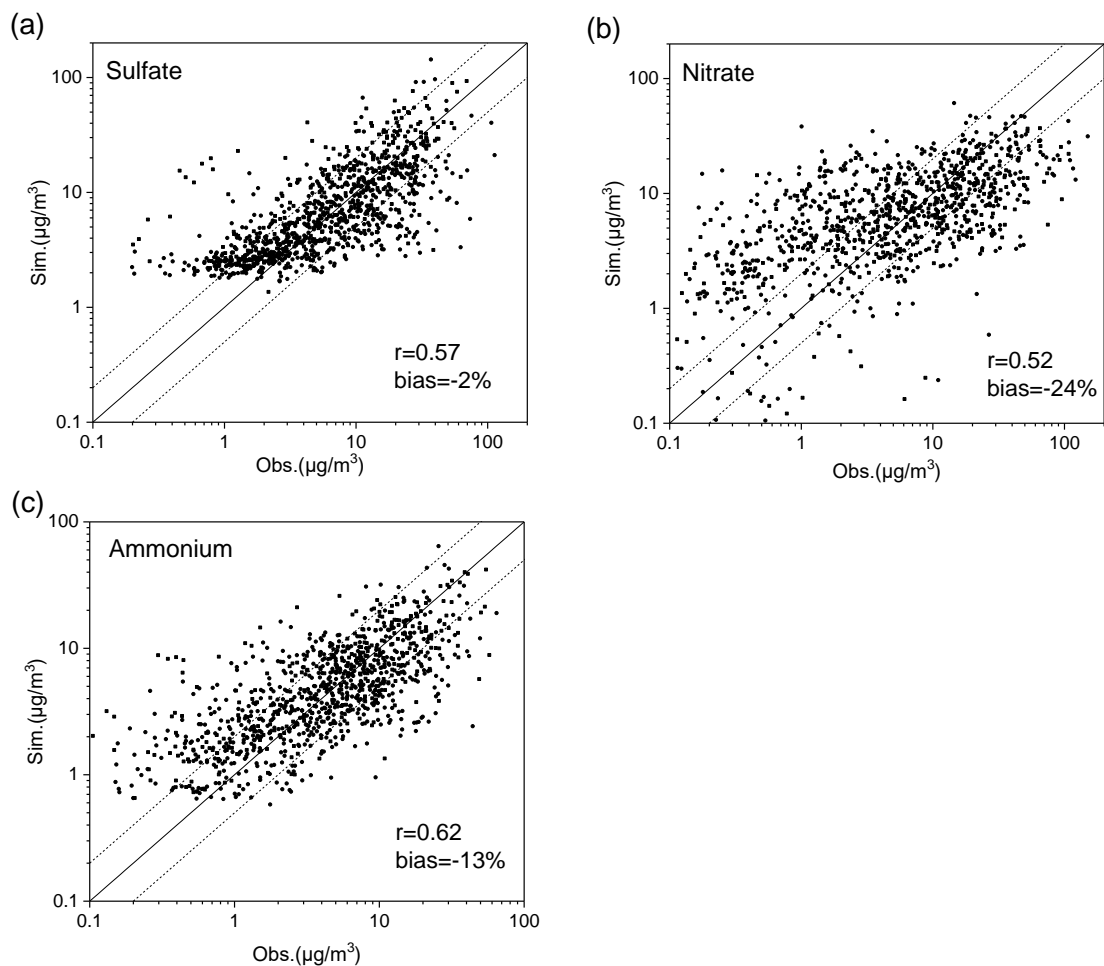

**Figure S3.** Comparison of modelled PM<sub>2.5</sub> sulfate (a), nitrate (b) and ammonium (c) concentrations with corresponding daily measurements of PM<sub>2.5</sub> from 2014 to 2016 over North China Plain. The model results were extracted from the first model level (~25m aboveground) and averaged at one day. The Pearson correlation coefficients and normalized mean bias are shown inset.

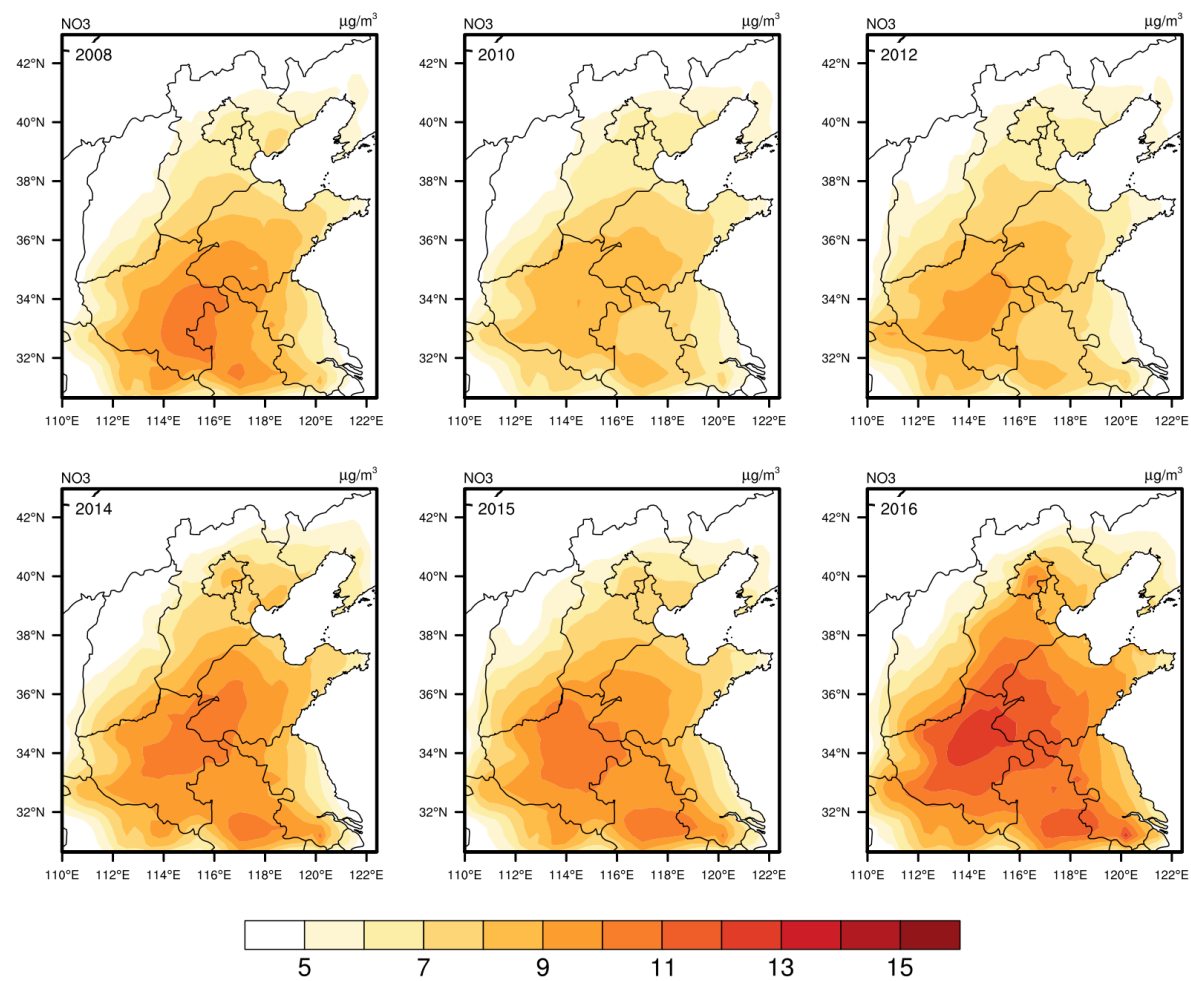

**Figure S4.** The simulated annual-mean concentrations of PM<sub>2.5</sub>-nitrate (µg/m<sup>3</sup>) over Northern China in recent years.

**Table S1** Annual consumption of synthetic fertilizers, populations of major livestock animals and the proportions of the intensive system in livestock animal rearing in Northern China from 2008 to 2016.

|                                                                           | 2008 | 2009 | 2010 | 2011 | 2012 | 2013 | 2014 | 2015 | 2016 |
|---------------------------------------------------------------------------|------|------|------|------|------|------|------|------|------|
| <b>Fertilizers (Ton)</b>                                                  |      |      |      |      |      |      |      |      |      |
| ammonium bicarbonate                                                      | 146  | 128  | 99   | 108  | 107  | 99   | 61   | 54   | 42   |
| Urea                                                                      | 477  | 489  | 520  | 506  | 507  | 509  | 538  | 532  | 523  |
| Compound Fertilizer                                                       | 120  | 127  | 135  | 140  | 145  | 149  | 160  | 163  | 168  |
| <b>Animals (Million)</b>                                                  |      |      |      |      |      |      |      |      |      |
| Beef                                                                      | 18.2 | 17.4 | 16.1 | 15.1 | 14.7 | 14.6 | 14.6 | 15.0 | 14.6 |
| Dairy                                                                     | 3.5  | 3.6  | 4.3  | 4.7  | 4.9  | 4.8  | 5.1  | 5.0  | 4.8  |
| Goat                                                                      | 49.2 | 45.4 | 43.4 | 42.8 | 42.1 | 42.1 | 43.0 | 44.2 | 37.8 |
| Sheep                                                                     | 17.3 | 19.7 | 19.3 | 20.6 | 21.3 | 22.1 | 23.2 | 23.1 | 26.9 |
| Pig                                                                       | 132  | 139  | 143  | 142  | 151  | 157  | 164  | 160  | 155  |
| Poultry                                                                   | 3056 | 3141 | 3209 | 3369 | 3658 | 3605 | 3424 | 3504 | 3635 |
| <b>Proportion of the intensive system in livestock animal rearing (%)</b> |      |      |      |      |      |      |      |      |      |
|                                                                           | 28   | 32   | 35   | 37   | 39   | 41   | 43   | 46   | 48   |
