# Supplementary material for: Rapid SO 2 emission reductions significantly increase troposphericammonia concentrations over the North China Plain
Source: Copernicus journal article supplement (doi:10.5194/acp-2018-880), 2018-09-05
Supplement: Supplementary file [file acp-2018-880-AC2-supplement.pdf]

## Response to Referee #2

*This manuscript addresses an important topic that is ultimately related to the air quality issues in China. The methodology is sound, as similarly done for the US regions by Yu et al. (2018). I believe it should be published after addressing the following major and minor issues.*

**Response:** We would like to thank the referee for the insightful comments. We accepted all the comments and suggestions, and improved the manuscript thoroughly.

*My major issue is how authors “claim” their results. Their sensitivity studies of (quote) “the SO<sub>2</sub> emission reduction of 50% from 2012 to 2016 could results in a 55% increase in the NH<sub>3</sub> columns, compared to that of 30% recorded by IASI observations.” : : : “the increasing trend of NH<sub>3</sub> can be entirely attributable to the SO<sub>2</sub> emission reductions.” (page 8, line 6-12). I do not believe such a conclusion can be drawn, unless the authors have performed and show quantitatively that all other mechanisms (NO<sub>x</sub>, NH<sub>3</sub> emissions, temperatures, precipitations, etc.) do not contribute to the NH<sub>3</sub> increase (see more below). The estimated increase of 55% being larger than the observations of 30% only indicates uncertainties.*

**Response:** Accepted. In addition to the evidences for the effect of SO<sub>2</sub> reduction on the NH<sub>3</sub> increase, we provided quantitative results of other mechanisms in the revised manuscript, as following.

- ◆ NH<sub>3</sub> emissions. Our inventory has demonstrated that NH<sub>3</sub> emissions in northern China experienced an overall decrease of 7% from 2008 to 2016. This decrease is caused by the changes in fertilizer use and livestock rearing practices in farms. The NH<sub>3</sub> emissions would decrease its concentrations in this period.
- ◆ NO<sub>x</sub> emissions. The anthropogenic NO<sub>x</sub> emissions in the North China Plain first increased from 2008 to 2012 by 10%, and then decreased by 23% afterwards. The overall trend of NO<sub>x</sub> emissions is a decrease of 17% during 2008–2016. However, our simulations indicated an increase of 28% in the mean particulate nitrate concentrations in the region from 2008–2016. It can be explained by the significantly increased NH<sub>3</sub> that facilitates the formation of ammonium nitrate as well as enhanced atmospheric oxidizing capacity. We re-run the simulation of 2016 by replacing the NO<sub>x</sub> emissions with those in 2008. The results indicate that the change in NO<sub>x</sub> emissions between 2008 and 2016 gives rise to a slight decrease in the NH<sub>3</sub> column concentrations of about 3%. So it cannot be responsible for the significant increase of NH<sub>3</sub>.

- ♦ Meteorological conditions. We did a sensitive simulation with meteorological fields in 2016 and anthropogenic emissions in 2012 (the period of 2012–2016 showing a rapid increase in NH<sub>3</sub>). The change in meteorological fields between the Run\_2012 and Run\_12\_M16 led to a decrease in NH<sub>3</sub> concentrations of ~3% over the North China Plain.

The above mechanisms totally decreased the NH<sub>3</sub> column concentrations by about 13%. So we conclude that the SO<sub>2</sub> emission reductions is responsible for the increasing trend of NH<sub>3</sub>. More details for other mechanisms (especially NO<sub>x</sub> emissions and meteorology) are shown in the following responses.

**Revisions:** (Page 5, Line 16-19) "the annual NH<sub>3</sub> emissions first experienced a decreasing tendency from 2008 to 2011 (3.0 Tg in 2009 to 2.8 Tg in 2011), and then remained constant at around 2.8 Tg during 2011–2016 over the North China Plain (Fig. 1b). The overall trend of NH<sub>3</sub> emissions demonstrated a decrease of about 7%."

(Page 9, Line 21-31) "To quantitatively understand the effect of NO<sub>x</sub> emission on the trend of NH<sub>3</sub>, we performed a sensitive experiment by repeating the simulation of 2016 with the NO<sub>x</sub> emissions in 2008 (Run\_16\_08N). By comparing the results among Run\_16, Run\_16\_08N, and Run\_08, we found that the reduction in NO<sub>x</sub> emissions (17% from 2008 to 2016) decreased the gaseous NH<sub>3</sub> concentrations by about 3% (Fig. S5). Specifically, because the reduced NO<sub>x</sub> in this period led to the transition of ozone (O<sub>3</sub>) photochemistry from VOC-limited to transitional regime with high O<sub>3</sub> production efficiency (Jin and Holloway, 2015), the simulated annual mean O<sub>3</sub> concentrations were elevated by 3.7 ppb over the North China Plain between the Run\_16\_08N and Run\_16 cases. The resultant enhancement in atmospheric oxidizing capacity would favor the conversion of NO<sub>2</sub> to NO<sub>3</sub><sup>-</sup> and therefore derive more NH<sub>3</sub> partitioning from gas to particle phases via aerosol thermodynamic equilibrium."

(Page 10, Line5-10) "In this work, we tested the effects of meteorological conditions on NH<sub>3</sub> variations by a simulation with meteorological fields in 2016 and anthropogenic emissions in 2012 (Run\_12\_M16). We selected these two years because NH<sub>3</sub> concentrations experienced a rapid increase during the period. This change in meteorological fields for the Run\_12\_M16 resulted in a decrease of 3% in annual mean NH<sub>3</sub> concentrations relative to the Run\_12 (Fig. S6)."

(Page 10, Line 20-23) "In this work, we demonstrate that the rapid reduction in SO<sub>2</sub> emissions was responsible for the increase in NH<sub>3</sub> over the North China Plain during 2008–2016, while other potential pathways (NH<sub>3</sub> emissions, NO<sub>x</sub> emissions, and meteorological conditions) decreased its concentrations by approximately 13% for this period."

(Page 10, Line 27-30) "First, the long-term NH<sub>3</sub> emission inventory presents a decreasing tendency of -7% in the emission, and therefore it cannot explain the NH<sub>3</sub> increase. The meteorological variations and the change in NO<sub>x</sub> emissions in the studying period decreased the NH<sub>3</sub> column concentrations both by about 3%."

*The last paragraph before Conclusion (page 9, line 14-22) is ambiguous and handwaving. These "other" mechanisms that are very likely to have also caused the gaseous NH<sub>3</sub> to increase, but were dismissed without sufficient quantitative data or figures to back it up. (quote) " : : particulate nitrate: : : concentrations appear to increase in the North China Plain between 2008 and 2016 despite a 23% reduction in NO<sub>x</sub> emission (Fig. S4). The in situ measurements in Beijing indicated that the NO<sub>3</sub>-concentrations fluctuated during 2013-2016. It implied that the NO<sub>x</sub> emission reduction could not be responsible for the increase in NH<sub>3</sub>." Should not "imply" a mechanism that "could not be" responsible: : : The same process for the SO<sub>2</sub> should be repeated for the NO<sub>x</sub>, if any conclusions were to be drawn about how NO<sub>x</sub> reduction affects the gaseous NH<sub>3</sub> concentration change. The in situ measurement in Beijing was used to make an argument, but no evidence was shown in the manuscript, additionally, the where about of the data is not included, which does not follow the ACP data policy.*

**Response:** Accepted. As suggested by the referee, we performed another sensitive simulation for 2016 by using NO<sub>x</sub> emissions in 2008. The resulting NH<sub>3</sub> column concentrations were 2% higher than those in the baseline simulation for 2016. When compared to the 2008 simulation, the reduction in NO<sub>x</sub> emissions during 2008–2016 decreased the NH<sub>3</sub> concentrations on average by 3%. We provide quantitative results in the revised manuscript and also show the effect of NO<sub>x</sub> emissions in Fig. S6.

The measurements of PM<sub>2.5</sub> chemical components (including sulfate, nitrate, and ammonium) were conducted in Peking University, Beijing since 2013 (please see Section 2.1). We show the inter-annual trend of PM<sub>2.5</sub> nitrate concentrations in Fig. 1 in the revised manuscript. The annual mean concentrations of nitrate fluctuated during 2013–2016 without a significant trend.

Based on these evidences from the sensitive simulation and the observations, the change in NO<sub>x</sub> emission has a negligible contribution on the NH<sub>3</sub> increase during 2008–2016.

**Revisions:** (Page 9, Line 16-32) "Since the chemical formation of particulate ammonium nitrate also affects the gas-particle partitioning of NH<sub>3</sub>, the role of NO<sub>x</sub> emissions should be discussed. We noted that unlike the trend of particulate sulfate in PM<sub>2.5</sub>, the simulated concentrations of particulate nitrate in PM<sub>2.5</sub> increased on average by 28% over the North China Plain between 2008 and 2016, despite a 17% reduction in NO<sub>x</sub> emissions (Fig.

S4). This trend can be partially explained by the increased  $\text{NH}_3$  in the atmosphere that would facilitate the formation of ammonium nitrate. To quantitatively understand the effect of  $\text{NO}_x$  emission on the trend of  $\text{NH}_3$ , we performed a sensitive experiment by repeating the simulation of 2016 with the  $\text{NO}_x$  emissions in 2008 (Run\_16\_08N). By comparing the results among Run\_16, Run\_16\_08N, and Run\_08, we found that the reduction in  $\text{NO}_x$  emissions (17% from 2008 to 2016)) decreased the gaseous  $\text{NH}_3$  concentrations by about 3% (Fig. S5). Specifically, because the reduced  $\text{NO}_x$  in this period led to the transition of ozone ( $\text{O}_3$ ) photochemistry from VOC-limited to transitional regime with high  $\text{O}_3$  production efficiency (Jin and Holloway, 2015), the simulated annual mean  $\text{O}_3$  concentrations were elevated by 3.7 ppb over the North China Plain between the Run\_16\_08N and Run\_16 cases. The resultant enhancement in atmospheric oxidizing capacity would favor the conversion of  $\text{NO}_2$  to  $\text{NO}_3^-$  and therefore derive more  $\text{NH}_3$  partitioning from gas to particle phases via aerosol thermodynamic equilibrium. Moreover, the measurements at an urban station of Beijing indicated a fluctuating trend of the annual mean  $\text{NO}_3^-$  concentrations during 2013–2016 (Fig. 1). Overall, the limited reduction in  $\text{NO}_x$  emissions cannot be responsible for the increased  $\text{NH}_3$ , because the concentrations of particulate nitrate remain high over the North China Plain during recent years."

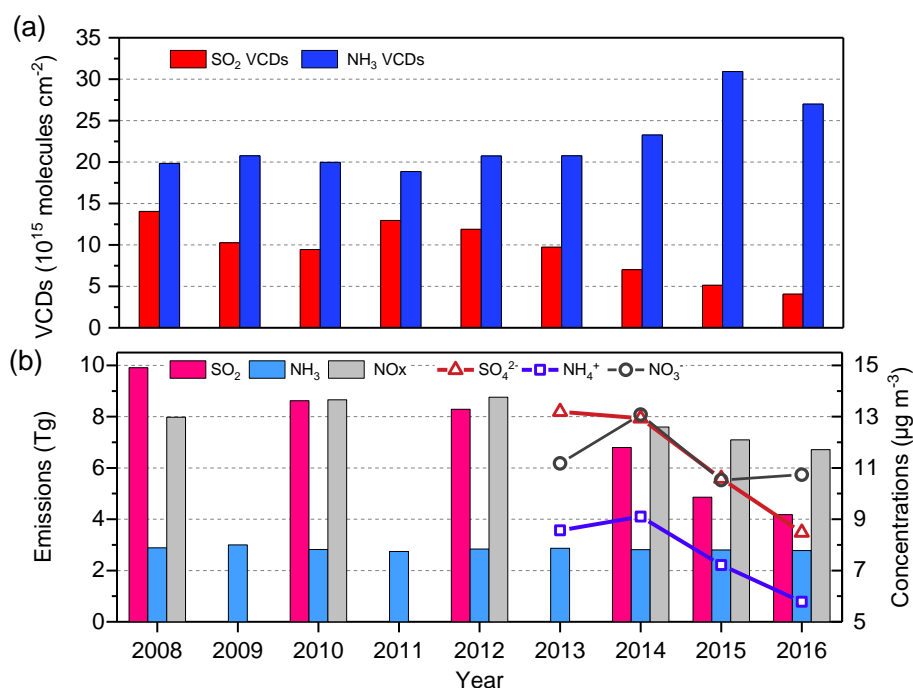

**Figure 1.** (a) Inter-annual trends of  $\text{SO}_2$  and  $\text{NH}_3$  VCDs averaged over North China Plain from 2008 to 2016. (b) Inter-annual trends of emissions of  $\text{SO}_2$ ,  $\text{NH}_3$ , and  $\text{NO}_x$  in the North China Plain from 2008 to 2016, and annual mean concentrations of  $\text{PM}_{2.5}$  sulfate, ammonium, and nitrate

derived from measurements at an urban station (Beijing, 39.99 °N, 116.3 °E) in North China Plain from 2013 to 2016.

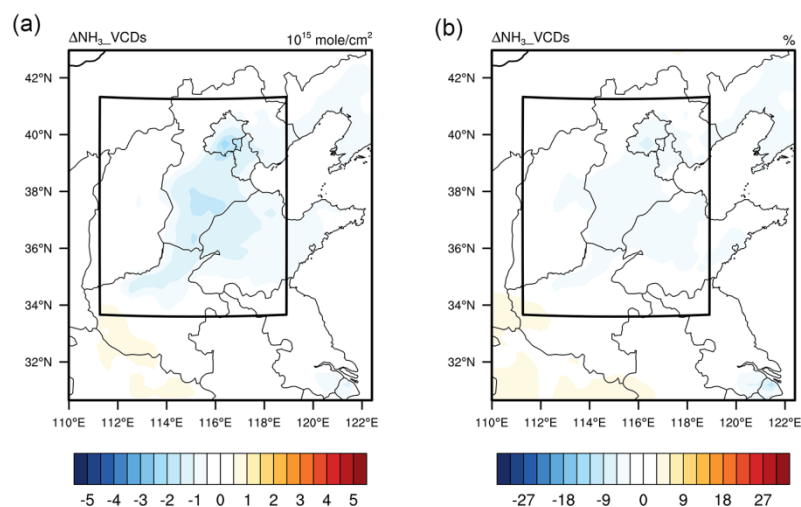

**Figure S5.** Absolute (a) and percent (b) changes in the simulated column concentrations of NH<sub>3</sub> between the Run\_16 and Run\_16\_N08 (NO<sub>x</sub> emissions in 2008). Negative values denote decreases due to the change in NO<sub>x</sub> emissions in the Run\_16\_N08. The black box represents the major area of interest in this study.

*Similarly, for meteorological effects, quote “We also tested the effects of meteorological conditions on NH<sub>3</sub> variations by a simulation with meteorological fields in 2016 and anthropogenic emissions in 2012 (Run\_16\_E12). Compared to the Run\_12 case, we found the change in meteorological fields (2012 vs. 2016) had a negligible influence on NH<sub>3</sub> concentrations in most of North China Plain.” None of these were shown quantitatively! Can’t make statements like these without any evidence. The following statement “Although temperature increase was reported to partly contribute to the positive trend of NH<sub>3</sub> (Warner et al., 2017; Fu et al., 2017), our simulations indicated that the overall meteorological factors could not explain the observed significant increase tropospheric NH<sub>3</sub> concentrations over North China Plain.” This sentence is misleading, as if the quoted studies were trying to explain the observed significant increase in tropospheric NH<sub>3</sub> concentrations by meteorological factors. In fact, Warner et al. (2017) emphasized the leading cause of the NH<sub>3</sub> increase was the reduction of SO<sub>2</sub> in China, I quote “Over China, a combination of expanded agricultural activities, nascent SO<sub>2</sub> control measures, and increasing temperatures cause the observed increases in ammonia.”*

**Response:** Accepted. The meteorological effects were examined in this study by the simulation for 2016 with anthropogenic emissions in 2012 (there was a pronounced increase in NH<sub>3</sub> columns in the period of 2012–2016). The resulting column concentration of NH<sub>3</sub> on average over the northern China was 3% lower than that in the baseline simulation of 2012. In the area of interest, this influence on the NH<sub>3</sub> column concentrations was

minor (marked with the black box in Fig. S6). We show these quantitative results in the revised manuscript.

We agree with the referee that Warner et al. emphasized the important role of the reduction of SO<sub>2</sub> in China in the trend of NH<sub>3</sub>. We cite the finding of Warner et al. (2017) to support our results.

**Revisions:** (Page 10, Line 3-11) "Besides, meteorological conditions are known to have an influence on NH<sub>3</sub> concentrations. Both Warner et al. (2017) and Fu et al. (2017) have found that elevated annual surface temperature partially contributed to the increase in NH<sub>3</sub> in East China over the past decade. In this work, we tested the effects of meteorological conditions on NH<sub>3</sub> variations by a simulation with meteorological fields in 2016 and anthropogenic emissions in 2012 (Run\_12\_M16). We selected these two years because NH<sub>3</sub> concentrations experienced a rapid increase during the period. This change in meteorological fields for the Run\_12\_M16 resulted in a decrease of about 3% in annual mean NH<sub>3</sub> concentrations relative to the Run\_12 (Fig. S6). Therefore, the inter-annual variability in meteorological conditions cannot explain the observed significant increase over the North China Plain."

(Page 10, Line 12-17) "Interestingly, increasing trends of gas-phase NH<sub>3</sub> in the atmosphere have also been observed in the last twenty years in the Midwest of the United States and Western Europe by satellite retrievals and ground measurements (Warner et al., 2017; Saylor et al., 2015; Fern and Hellstern, 2012). The marked decreases in SO<sub>2</sub> and NO<sub>x</sub> emissions were largely responsible for these increases, as confirmed by the corresponding trends of particulate sulfate and nitrate concentrations. Warner et al. (2017) infer that SO<sub>2</sub> emission reduction in China may be a leading cause of the increased NH<sub>3</sub>."

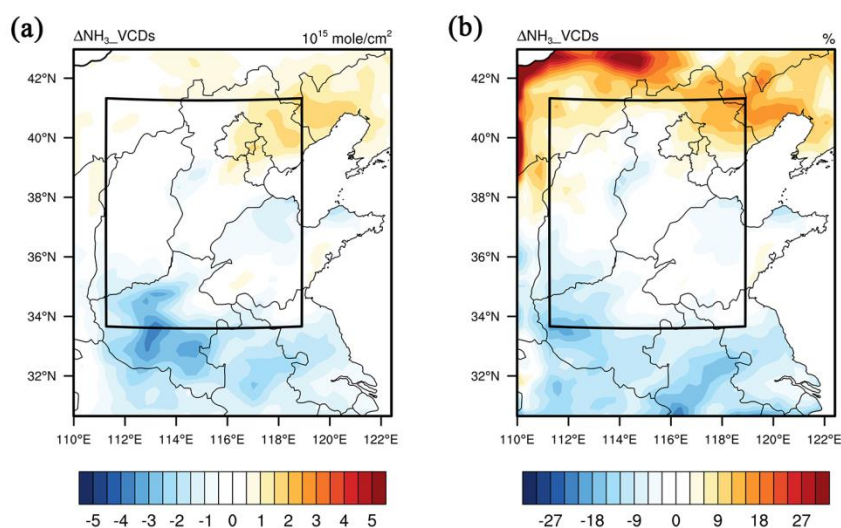

**Figure S6.** Absolute (a) and percent (b) changes in the simulated column concentrations of NH<sub>3</sub> between the Run\_12 and Run\_12\_16M. Negative values denote decreases due to the change in meteorological fields in the Run\_12\_16M. The black box represents the major area of interest in this study.

*My minor issues are mainly related to language and choice of words. I believe this manuscript needs to go through English editor at ACP. Also, many word choices are not appropriate for concise scientific publications, and somewhat wishy-washy, e.g., “appear to”, “could not be”, “may be a potential”, “could be responsible”, “would bias”, “: : : concentrations disappeared”, “: : : is practically zero: : :”, “could result”, “were almost consistent”, “could make”, implied”, “for almost the entire: : :”, “not well-regulated”, “can increase: : :”, “may alter”: : .*

**Response:** Accepted. We reworded most of these statements to make them clearer and appropriate for scientific publications. Please see the following revisions:

**Revision:** **Before (abbreviated as B hereafter):** we noted that the simulated particulate nitrate (NO<sub>3</sub><sup>-</sup>) concentrations appear to increase.

**Revision (abbreviated as R hereafter):** (Page 9, Line 17) We noted that unlike the trend of particulate sulfate in PM<sub>2.5</sub>, the simulated concentrations of particulate nitrate in PM<sub>2.5</sub> increased on average by 28% over the North China Plain between 2008 and 2016, despite a 17% reduction in NO<sub>x</sub> emissions.

B: It implied that the NO<sub>x</sub> emission reduction could not be responsible for the increase in NH<sub>3</sub>.

R: (Page 10, Line 1) Overall, the limited reduction in NO<sub>x</sub> emissions cannot be responsible for the increased NH<sub>3</sub> and even had a negative contribution, because the concentrations of particulate nitrate remain high over the North China Plain during recent years.

B: although it may be a potentially important contributor to haze pollution in China.

R: (Page 2, Line 17) although they serve as an important contributor to haze pollution in China.

B: which could be responsible for such deviation between the model and observations.

R: (Page 6, Line 27) which was partially responsible for such deviation between the model and observations.

B: the relative error weighting mean method would bias a high result.

R: (Page 7, Line 11) the relative error weighting mean method always biased a high result.

B: the increasing trend of NH<sub>3</sub> column concentrations disappeared

R: (Page 7, Line 19) the increasing trend of NH<sub>3</sub> column concentrations

was not observed

B: we found that the rapid SO<sub>2</sub> emission reduction of 50% from 2012 to 2016 could result in a 55% increase in the NH<sub>3</sub> columns

R: (Page 8, Line 13) we found that the rapid SO<sub>2</sub> emission reduction of 50% from 2012 to 2016 resulted in a 55% increase in the NH<sub>3</sub> columns

B: The seasonal variations in SO<sub>4</sub><sup>2-</sup> decreases and NH<sub>3</sub> increases were almost consistent

R: (Page 8, Line 32) The seasonal variations in SO<sub>4</sub><sup>2-</sup> decreases and NH<sub>3</sub> increases were consistent

B: which could make the response of SO<sub>4</sub><sup>2-</sup> concentrations to SO<sub>2</sub> emission reductions more sensitive

R: (Page 9, Line 10) which makes the response of SO<sub>4</sub><sup>2-</sup> concentrations to SO<sub>2</sub> emission reductions more sensitive

B: It implied that the NO<sub>x</sub> emission reduction could not be responsible for the increase in NH<sub>3</sub>

R: (Page 10, Line 1-2) the limited reduction in NO<sub>x</sub> emissions cannot be responsible for the increased NH<sub>3</sub> and even had a negative contribution, because the concentrations of particulate nitrate remain high over the North China Plain during recent years

B: Our work strongly indicates that the rapid SO<sub>2</sub> emission reductions (60%) from 2008 to 2016 were responsible for almost the entire NH<sub>3</sub> increases

R: (Page 10, Line 30) Our work strongly indicates that the rapid SO<sub>2</sub> emission reductions (60%) from 2008 to 2016 were responsible for the NH<sub>3</sub> increase

B: a continued increase in NH<sub>3</sub> concentrations is anticipated if NH<sub>3</sub> emissions are not well-regulated

R: (Page 11, Line 12) a continued increase in NH<sub>3</sub> concentrations is anticipated if NH<sub>3</sub> emissions are not regulated

*Page 2 line 11: "As a major agricultural country, China is the world's largest emitter of NH<sub>3</sub>: : : " what about India?*

**Response:** Accepted. The REAS2 inventory estimated the NH<sub>3</sub> emissions in India of 9.87 Tg, which is almost the same as those in China (Li et al., 2017; Kurokawa et al., 2013). We reword this sentence.

**Revisions:** (Page 2, Line 13) "As a major agricultural country, China is one of the world's largest emitters of NH<sub>3</sub>."

*Page 2 line 15: ": : : may be potentially important contributor to haze: : : " It's a known fact!*



**Response:** Accepted. We rewrite this sentence.

**Revisions:** (Page 2, Line 17-18) "Until now, NH<sub>3</sub> emissions have not been regulated by the Chinese government, although they serve as an important contributor to haze pollution in China."

*Page 2 line 17-19: "Interestingly, satellite observations over the past decade have shown an increase in tropospheric columns of gaseous NH<sub>3</sub> in this area (Warner et al., 2017). But no quantitative studies have been performed to explain it." Warner et al. (2017) was a quantitative study using observations. Should be "But no sensitivity studies: : :"*

**Response:** Accepted. We reworded the sentence.

**Revisions:** (Page 2, Line 22-23) "But no sensitive studies have been performed to explain it, especially from a modelling perspective."

*Page 2 line 19-20: "Along-term bottom-up inventory indicated that NH<sub>3</sub> emissions in China have displayed a slightly decreasing tendency." Needs references!*

**Response:** Accepted. The corresponding reference is added here.

**Revisions:** (Page 2, Line 23-25) "A long-term bottom-up inventory indicated that NH<sub>3</sub> emissions in China have displayed a slightly decreasing tendency (Kang et al., 2016)."

*Page 3 line 10: "Here, we hypothesize that the rapid SO<sub>2</sub> emission reduction is the reason for the increase in tropospheric NH<sub>3</sub>: : : " Several studies have published the fact that the SO<sub>2</sub> emission reduction is the reason: : ;, not a hypothesis anymore. Should reference others' publications here, for global studies or in other regions, than in the North China.*

**Response:** Accepted. We provide those references in the revised manuscript.

**Revisions:** (Page 3, Line 1-3) "Several studies have proposed that reduction in SO<sub>2</sub> emissions or NO<sub>x</sub> emissions is an important factor in determining the increase in atmospheric NH<sub>3</sub> concentrations on the global and region scales (Warner et al., 2017; Yu et al., 2018; Saylor et al., 2014)."

(Page 3, Line 13-14) "Here, we hypothesize that the rapid SO<sub>2</sub> emission reduction is the main cause of the increase in tropospheric NH<sub>3</sub> concentrations over the North China Plain."

*Page 4 line 9: Please pay attention to the order when acronyms are introduced and used throughout the paper.*

**Response:** Accepted. We check the use of acronyms throughout the manuscript, including WRF-Chem, IASI, MEIC, etc.

*Page 4 line 15: MEIC should be defined on Page 3 line 7.*

**Response:** Accepted. We add a related reference for MEIC.

**Revisions:** (Page 3, Line 9) "the Multi-resolution Emission Inventory for China (MEIC) (Zheng et al., 2018)."

*Page 4 line 15: "were cut" use reduced.*

**Response:** Accepted. We reword it.

**Revisions:** (Page 4, Line 16-17) "the annual SO<sub>2</sub> emissions in North China Plain were reduced by about 60% "

*Page 4 line 19: remove "by our research group"*

**Response:** Accepted. We remove it.

**Revisions:** (Page 4, Line 20-21) "A high-resolution NH<sub>3</sub> emission inventory (1km×1km, month) was developed based on the bottom-up method."

*Page 4 line 21: "in our previous studies: : : " should be "studies by: : : "*

**Response:** Accepted. We reword the sentence.

**Revisions:** (Page 4, Line 22-23) "The full details can be found in studies by"

*Page 5 line 5-7: "Meanwhile: : : " needs references.*

**Response:** Accepted. The data about agricultural activities were shown in Table S1. The references for the source of data were shown in the supplementary file.

**Revisions:** (Page 5, Line 23-26) "On the other hand, the number of some major livestock increased (Beef -20%, Dairy +39%, Goat -23%, sheep +55%, Pig +18%, and Poultry +19%; see Table S1 for details), while the proportion of intensive animal rearing systems rises to nearly half of the livestock industry in 2016, compared to only 28% in 2008 (Table S1)."

*Page 5 line 11: use IASI.*

**Response:** Accepted. We reword the sentence.

**Revisions:** (Page 5, Line 6) "According to the measurements by IASI, the North China Plain showed the highest VCDs of NH<sub>3</sub> in China"

*Page 6 line 22: "which could be responsible", add partially responsible: : :*

**Response:** Accepted. We reword the sentence in the revised paper.

**Revisions:** (Page 6, Line 26-28) "but it has not been fully included in our bottom-up inventory, which was partially responsible for such deviation between the model and observations"

*Page 6 line 23-24: bad sentence, rewrite.*

**Response:** Accepted. We rewrite it.

**Revisions:** (Page 6, Line 29-31) "We calculated the NH<sub>3</sub> VCDs from the simulations by integrating NH<sub>3</sub> molecular concentrations from the surface level to top troposphere. The results agreed well with the observed NH<sub>3</sub> columns of 2016 on the magnitude and spatial-temporal patterns (Fig. S2)."

*Page 7 line 3: "Moreover, we also: : :", remove also.*

**Response:** Accepted. We remove it.

**Revisions:** (Page 7, Line 2) "Moreover, we evaluated the modelled SNA concentrations using the filter-based PM<sub>2.5</sub> samples at an urban atmospheric monitoring station in North China Plain during 2014–2016."

*Page 7 line 18-19: "These tests support: : :" Too absolute! No other mechanisms?*

**Response:** Accepted. We rewrite this statement.

**Revisions:** (Page 7, Line 25-27) "Therefore, we deduce that the rapid SO<sub>2</sub> emission reductions are responsible for the increased NH<sub>3</sub> levels during 2008–2016, while other mechanisms may be negative contributors. More details on these effects are shown in the following."

*Fig. 2: use whole words for Sim., Obs., Sep., and Aug.*

**Response:** Accepted. We modify the words and the figure.

**Revisions:**

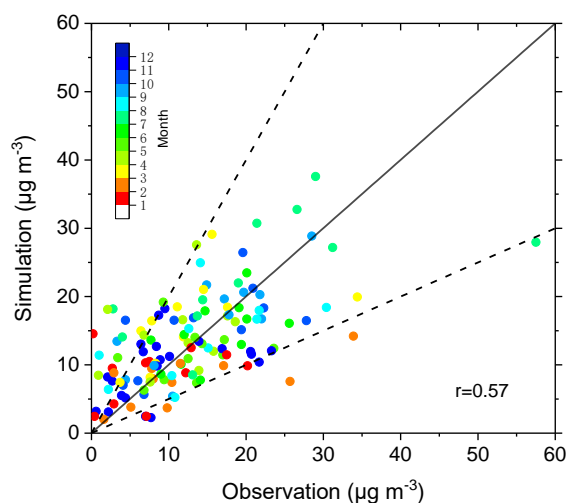

**Figure 2.** Comparison of modelled gaseous  $\text{NH}_3$  concentrations with corresponding monthly measurements of  $\text{NH}_3$  from September 2015 to August 2016. The 1:2 and 2:1 dashed lines are shown for reference and the Pearson correlation coefficient is shown inset.

## References

- Ferm, M., and Hellsten, S.: Trends in atmospheric ammonia and particulate ammonium concentrations in Sweden and its causes, *Atmos. Environ.*, 61, 30-39, <https://doi.org/10.1016/j.atmosenv.2012.07.010>, 2012.
- Fu, X., Wang, S., Xing, J., Zhang, X., Wang, T., and Hao, J.: Increasing Ammonia Concentrations Reduce the Effectiveness of Particle Pollution Control Achieved via  $\text{SO}_2$  and  $\text{NO}_x$  Emissions Reduction in East China, *Environ. Sci. Tech. Lett.*, 4, 221–227, [10.1021/acs.estlett.7b00143](https://doi.org/10.1021/acs.estlett.7b00143), 2017.
- Jin, X., and Holloway, T.: Spatial and temporal variability of ozone sensitivity over China observed from the Ozone Monitoring Instrument, *J. Geophys. Res. Atmos.*, 120, 7229-7246, [doi:10.1002/2015JD023250](https://doi.org/10.1002/2015JD023250), 2015.
- Kang, Y., Liu, M., Song, Y., Huang, X., Yao, H., Cai, X., Zhang, H., Kang, L., Liu, X., Yan, X., He, H., Zhang, Q., Shao, M., and Zhu, T.: High-resolution ammonia emissions inventories in China from 1980 to 2012, *Atmos. Chem. Phys.*, 16, 2043-2058, [10.5194/acp-16-2043-2016](https://doi.org/10.5194/acp-16-2043-2016), 2016.
- Kurokawa, J., Ohara, T., Morikawa, T., Hanayama, S., Janssens-Maenhout, G., Fukui, T., Kawashima, K., and Akimoto, H.: Emissions of air pollutants and greenhouse gases over Asian regions during 2000–2008: Regional Emission inventory in ASia (REAS) version 2, *Atmos. Chem. Phys.*, 13, 11019-11058, [10.5194/acp-13-11019-2013](https://doi.org/10.5194/acp-13-11019-2013), 2013.

- Li, M., Zhang, Q., Kurokawa, J. I., Woo, J. H., He, K., Lu, Z., Ohara, T., Song, Y., Streets, D. G., Carmichael, G. R., Cheng, Y., Hong, C., Huo, H., Jiang, X., Kang, S., Liu, F., Su, H., and Zheng, B.: MIX: a mosaic Asian anthropogenic emission inventory under the international collaboration framework of the MICS-Asia and HTAP, *Atmos. Chem. Phys.*, 17, 935-963, 10.5194/acp-17-935-2017, 2017.
- Saylor, R., Myles, L., Sibble, D., Caldwell, J., and Xing, J.: Recent trends in gas-phase ammonia and PM<sub>2.5</sub> ammonium in the Southeast United States, *J Air Waste Manag Assoc*, 65, 347-357, 10.1080/10962247.2014.992554, 2015.
- Warner, J. X., Dickerson, R. R., Wei, Z., Strow, L. L., Wang, Y., and Liang, Q.: Increased atmospheric ammonia over the world's major agricultural areas detected from space, *Geophys. Res. Lett.*, 44, 2875-2884, 10.1002/2016gl072305, 2017.
- Zheng, B., Tong, D., Li, M., Liu, F., Hong, C., Geng, G., Li, H., Li, X., Peng, L., Qi, J., Yan, L., Zhang, Y., Zhao, H., Zheng, Y., He, K., and Zhang, Q.: Trends in China's anthropogenic emissions since 2010 as the consequence of clean air actions, *Atmos. Chem. Phys.*, 18, 14095-14111, 10.5194/acp-18-14095-2018, 2018.
